# Supplementary material for: Click chemistry functionalization improving the wideband optical-limiting performance of fullerene derivatives
Source: Royal Society of Chemistry journal article supplement (doi:10.1039/c6cp00002a), 2016-01-01
Supplement: c6cp00002a1.pdf [file c6cp00002a1.pdf]

## Click chemistry functionalization improving the wideband optical-limiting performance of fullerene derivatives

### Supporting Information

#### Contents:

**Fig. S1.** UV-vis spectra of the compounds (N-E, N-Q, and N-F) in dichloromethane at 298 K.

**Fig. S2.** Cycle voltammograms of the compounds (N-E, N-Q, and N-F) in dichloromethane/ $\text{Bu}_4\text{NPF}_6$  at 293 K.

**Fig. S3.** The calculated HOMO and LUMO levels of N-Q-C60 (a) and N-F-C60 (b) models

Measurement of third-order nonlinear optical and parameters calculation

**Fig. S4.** Z-scan curves in dichloromethane at 532 nm: (a) Close aperture trace for N-E-C60; (b) Close aperture trace for N-Q-C60; (c) Close aperture trace for N-F-C60.

**Fig. S5.** Z-scan curves in dichloromethane at 1064 nm: (a) Close aperture trace for N-E-C60; (b) Close aperture trace for N-Q-C60; (c) Close aperture trace for N-F-C60.

#### 1. UV-vis property

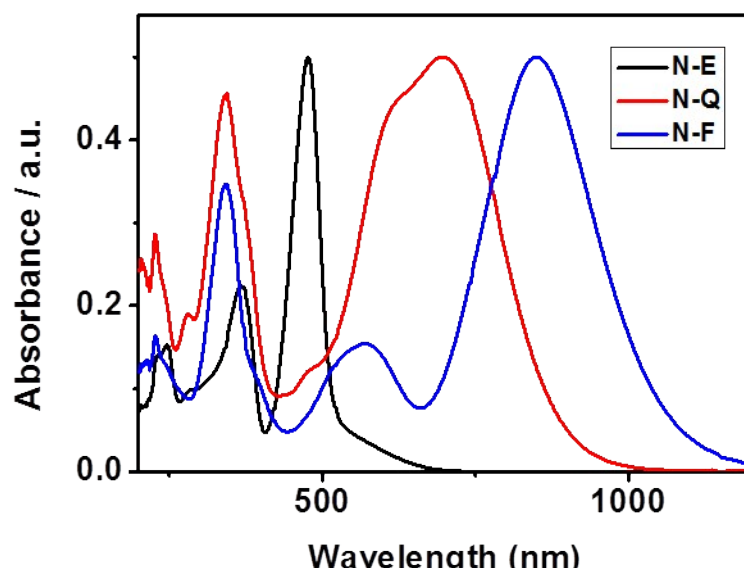

**Fig. S1.** UV-vis spectra of the compounds (N-E, N-Q and N-F) in dichloromethane at rt.

## 2. Electrochemical Test

The redox properties of all the novel compounds were investigated by cyclic voltammetry (CV) in dichloromethane ( $1 \times 10^{-3}$  M, 0.1 M  $n\text{Bu}_4\text{NPF}_6$ , all potentials vs. the ferricinium/ferrocene couple ( $\text{Fc}^+/\text{Fc}$ )). The energy levels were calculated using the Ferrocene (Fc) value of -4.8 eV with respect to the vacuum level, which was defined as zero. The measured oxidation potential of Fc (vs Ag/AgCl) was 0.18 V. Therefore, the HOMO energy ( $E_{\text{HOMO}}$ ) levels of the products could be calculated by the equation  $E_{\text{HOMO}} = -e[E_{\text{onset}}(\text{ox}) - E_{1/2,\text{Fc}} + 4.8 \text{ V}]$  and the LUMO energy ( $E_{\text{LUMO}}$ ) levels could be estimated by the equation  $E_{\text{LUMO}} = -e[E_{\text{onset}}(\text{red}) - E_{1/2,\text{Fc}} + 4.8 \text{ V}]$ , where  $E_{1/2,\text{Fc}}$  standards for the half-wave potential of  $\text{Fc}/\text{Fc}^+$ .

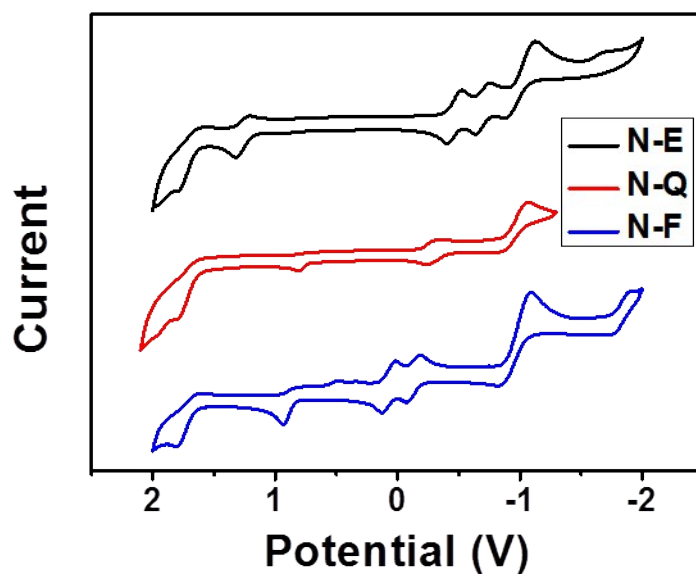

**Fig. S2.** Cycle voltammograms of the compounds (N-E, N-Q and N-F) in dichloromethane / $\text{Bu}_4\text{NPF}_6$  at rt.

## 3. DFT simulation

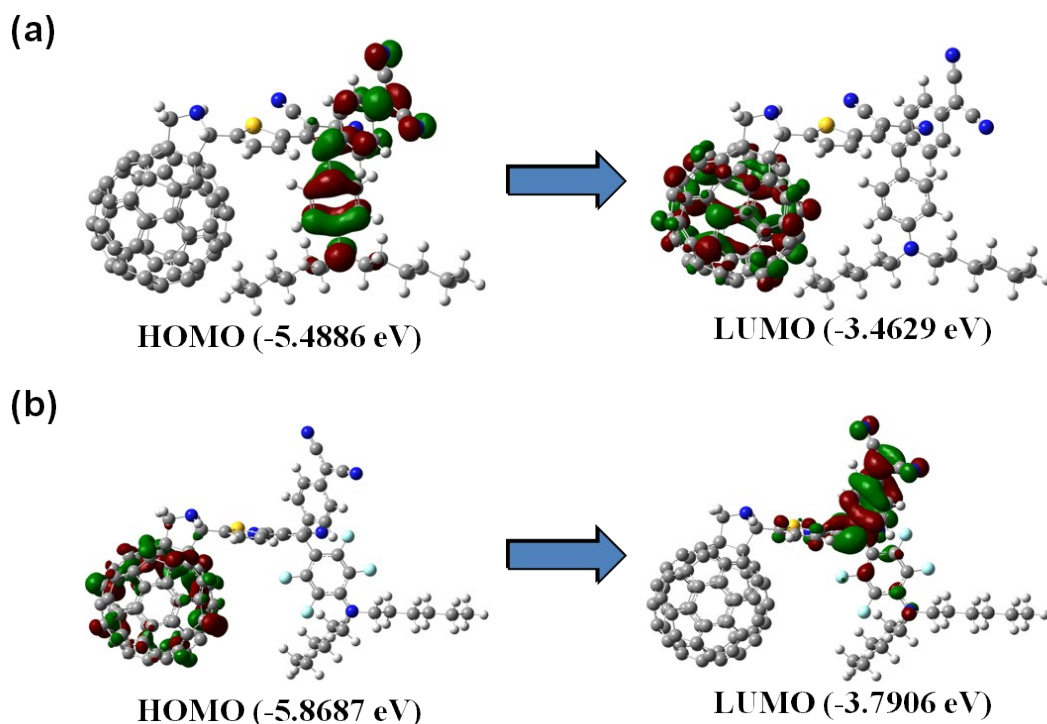

**Fig. S3.** The optimized structures and electron distributions of HOMO and LUMO levels of N-Q-C60 (a) and N-F-C60 (b) models

#### 4. Measurement of third-order nonlinear optical and parameters calculation

##### 4.1 Measurement

The nonlinear optical properties (NLO) response was measured by means of Z-scan technique, employing 21 ps laser pulses at 532 nm and 1064 nm delivered by a mode-locked Nd:YAG laser. Z-scan is a relatively simple experimental technique allowing for the simultaneous determination of the real and imaginary parts of the third-order susceptibility  $\chi^{(3)}$ .<sup>2</sup> All of the samples were measured at  $10^{-6}$  M solution in dichloromethane solvent (specpure). The solvent itself does not show any third-order nonlinearity under our experimental conditions. The nonlinear refractive index  $n_2$  and the nonlinear absorption coefficient  $\beta$  would be available under measurement. The real and imaginary parts of the third-order nonlinear susceptibility  $\chi_{\text{Re}}^{(3)}$  and  $\chi_{\text{Im}}^{(3)}$  and

the third-order nonlinear susceptibility  $\chi^{(3)}$  can be calculated by the previous method given in 4.2 (as followed).

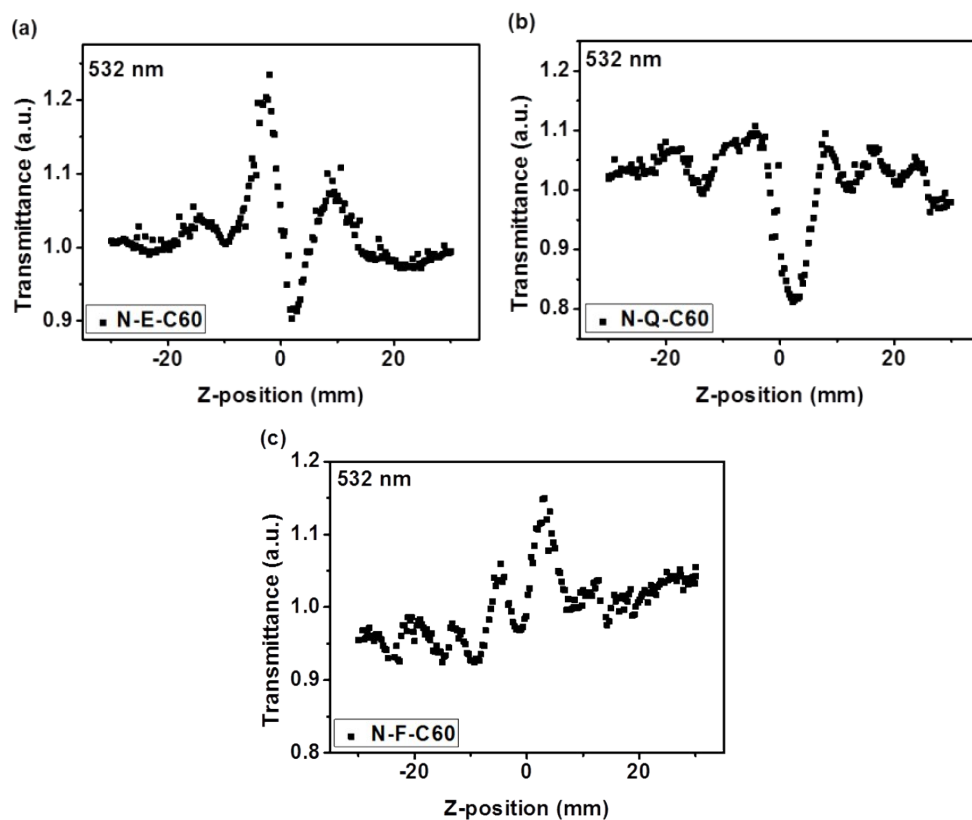

**Fig. S4.** Z-scan curves in dichloromethane at 532 nm: (a) Close aperture trace for N-E-C60; (b) Close aperture trace for N-Q-C60; (c) Close aperture trace for N-F-C60.

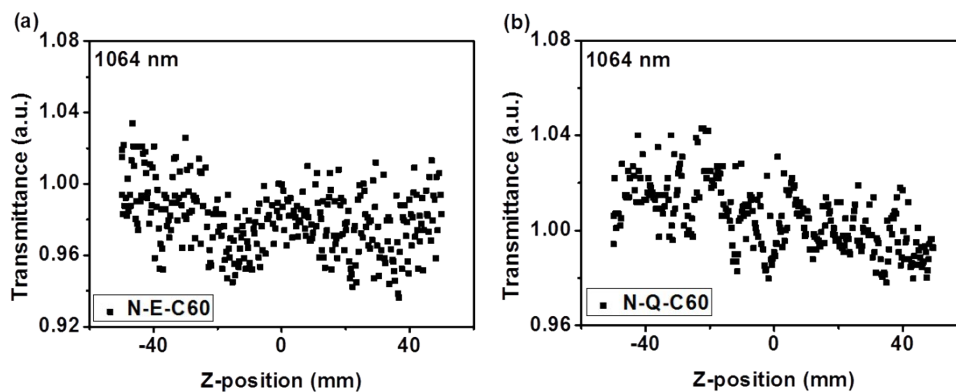

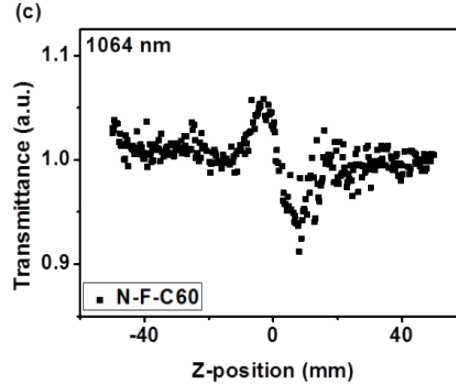

**Fig. S5.** Z-scan curves in dichloromethane at 1064 nm: (a) Close aperture trace for N-E-C60; (b) Close aperture trace for N-Q-C60; (c) Close aperture trace for N-F-C60.

#### 4.2 Calculation

In theory [1-3], the normalized transmittance for the open aperture can be written as:

$$T(z, s = 1) = \sum_{m=0}^{\infty} \frac{[-q_0(z,0)]^m}{(m+1)^{3/2}} \quad \text{for } |q_0| < 1 \quad (1)$$

where  $q_0(z) = \frac{\alpha I(t) L_{eff}}{1 + Z^2/Z_0^2}$ ,  $\alpha$  is the nonlinear absorption coefficient,  $I_0(t)$  is the intensity of laser beam at focus ( $z=0$ ),  $L_{eff} = [1 - \exp(-\alpha_0 L)]/\alpha_0$  is the effective thickness with  $\alpha_0$  the linear absorption coefficient and  $L$  the sample thickness,  $z_0$  is the diffraction length of the beam, and  $z$  is the sample position. Thus, the nonlinear absorption coefficients of the compounds can be determined by fitting the experimental data using Eq. (1).

The normalized transmission for the closed aperture Z-scan is given by the following:

$$T = 1 + \frac{4\Delta\Phi_0 x}{(x^2 + 9)(x^2 + 1)} \quad (2)$$

where  $x = z/z_0$  and  $\Delta\Phi$  is on-axis phase change caused by the nonlinear refractive index of the sample and  $\Delta\Phi = 2\pi n_2 I_0 L_{\text{eff}}/\lambda$ . Thus, the nonlinear refractive coefficients of the compounds can be determined by fitting the experimental data using Eq.(2).

The  $\chi^{(3)}$  can be calculated by Eq.(3):

$$|\chi^{(3)}| = \sqrt{\left| \frac{n_0^2 c}{120\pi^2} n_2 \right|^2 + \left| \frac{c^2 n_0^2}{240\pi^2 \omega} \beta \right|^2} \quad (3)$$

where  $\omega = 2\pi c/\lambda$ ,  $c$  is the speed of light,  $n_0$  is the refractive index of the medium.

## References:

- [1] Sheik-Bahae M, Said AA, Wei TH, Hagan DJ, Vanstryland EW. Sensitive measurement of optical nonlinearities using a single beam. IEEE J Quantum Electron 1990; 26:760-769.
- [2] Wang X, Guang SY, Xu HY, Su XY, Yang JY, Song YL, Lin NB, Liu XY. Thermally stable oxadiazole-containing polyacetylenes: Relationship between molecular structure and nonlinear optical properties. J Mater Chem 2008; 18: 4204-4209.
- [3] Zhang WS, Wang D, Cao H, Yang H. Energy-level tunable click functionalization of [60]fullerene for nonlinear optics. Tetrahedron 2014; 21: 573-577.
